# Supplementary material for: 14-3-3 Proteins Participate in Light Signaling through Association with PHYTOCHROME INTERACTING FACTORs
Source: MDPI journal article supplement (doi:10.3390/ijms151222801), 2014-12-09

## Supplementary Information

**Figure S1.** PIF3 amino acid sequence: red, complete 14-3-3 binding sites (RXXSXP) (bold, predicted phosphorylation sites); blue, incomplete 14-3-3 binding sites (RXXS/T).

MPLFELFRLTKAKLESAQD**RNPSPP**VDEVVELVWENGQISTQSQSSRSRN  
IPPPQANSSRAREIGNGSKTTMVDEIPMSVPSLMTGLSQDDDFVPWLNHH  
PSLDGYCSDFL**RDVSSP**VTVNEQESDMAVNQTAFPLFQRRKDGNESAPAA  
SSSQYNGFQSHSLYGSDRARDLPSQQTNPDRFTQTQEPLITSNKPSLVNF  
SHFL**RPAT**FAKTTNNNLHDTKEKSPQSPPNVFQTRVLGAKDSEDKVLNES  
VASATPKDNQKACLISEDSCRKDQESEKAVVCSSVSGSGLDGPSESPSL  
SLK**RKHS**NIQDIDCHSEDEVVEESGDGRKEAGPSRTGLGSK**RSRS**AEVHNL  
SERRRRDRINEKMRALQELIPNCNKVDKASMLDEAIEYLYLQVQIMS  
MASGYLPPAVMFPPGMGHYPAAAAAMAMGMGPYAMGLPDL**RGGS**SVN  
HGPQFQVSGMQQQPVAMGIPRVSGGGIFAGSSTIGNGST**RDLS**GSKDQTT  
TNNNSNLKPIKRKQGSSDQFCGSS

**Figure S2.** Yeast two-hybrid analysis of 14-3-3k with CONSTITUTIVE PHOTOMORPHOGENIC1 (COP1). The interaction was determined by filter assay. Positive and negative controls are shown in Figure 1.

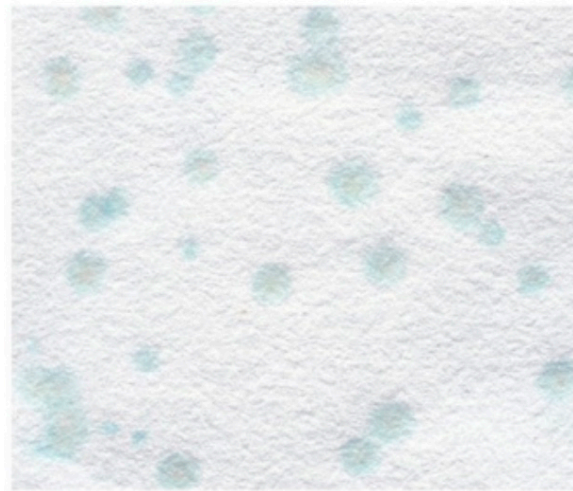

Supplement: s1 [file s1]
